# Supplementary material
Source: ML conference proceedings conference paper supplement (https://openaccess.thecvf.com/content/CVPR2024/html/Liu_SANeRF-HQ_Segment_Anything_CVPR_2024_paper.html)
Supplement: Supplementary file 1 [file Liu_SANeRF-HQ_Segment_Anything_CVPR_2024_supplemental.zip]

Archive with 2 entries (2 files):
- CVPR2024_camera_ready_supp.pdf
- supp_mtrl_video.mp4
